# Supplementary material for: Genome-Wide Comparative Analysis of the R2R3-MYB Gene Family in Five Solanaceae Species and Identification of Members Regulating Carotenoid Biosynthesis in Wolfberry
Source: MDPI journal article supplement (doi:10.3390/ijms23042259), 2022-02-18
Supplement: s1 [file s1]

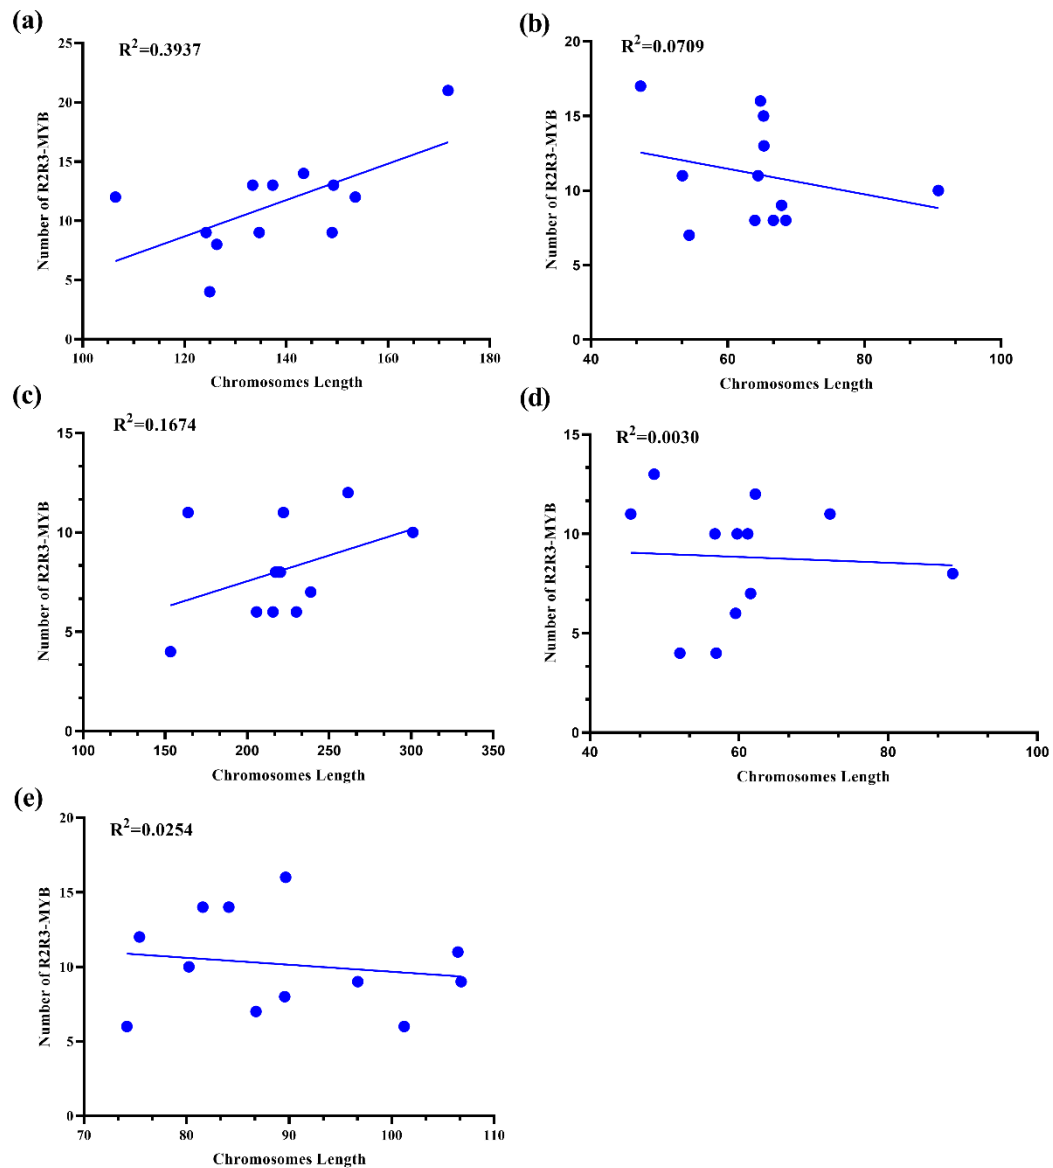

Figure S4. Relationship between the number of *R2R3-MYB* genes and Chromosome length. The x-axis represents chromosomes length. The y-axis represents the number of *R2R3-MYB* genes. (a) wolfberry, (b) tomato, (c) pepper, (d) potato, (e) eggplant
