# Supplementary figures and images for: Genome-Wide Comparative Analysis of the R2R3-MYB Gene Family in Five Solanaceae Species and Identification of Members Regulating Carotenoid Biosynthesis in Wolfberry
Source: MDPI journal article supplement (doi:10.3390/ijms23042259), 2022-02-18

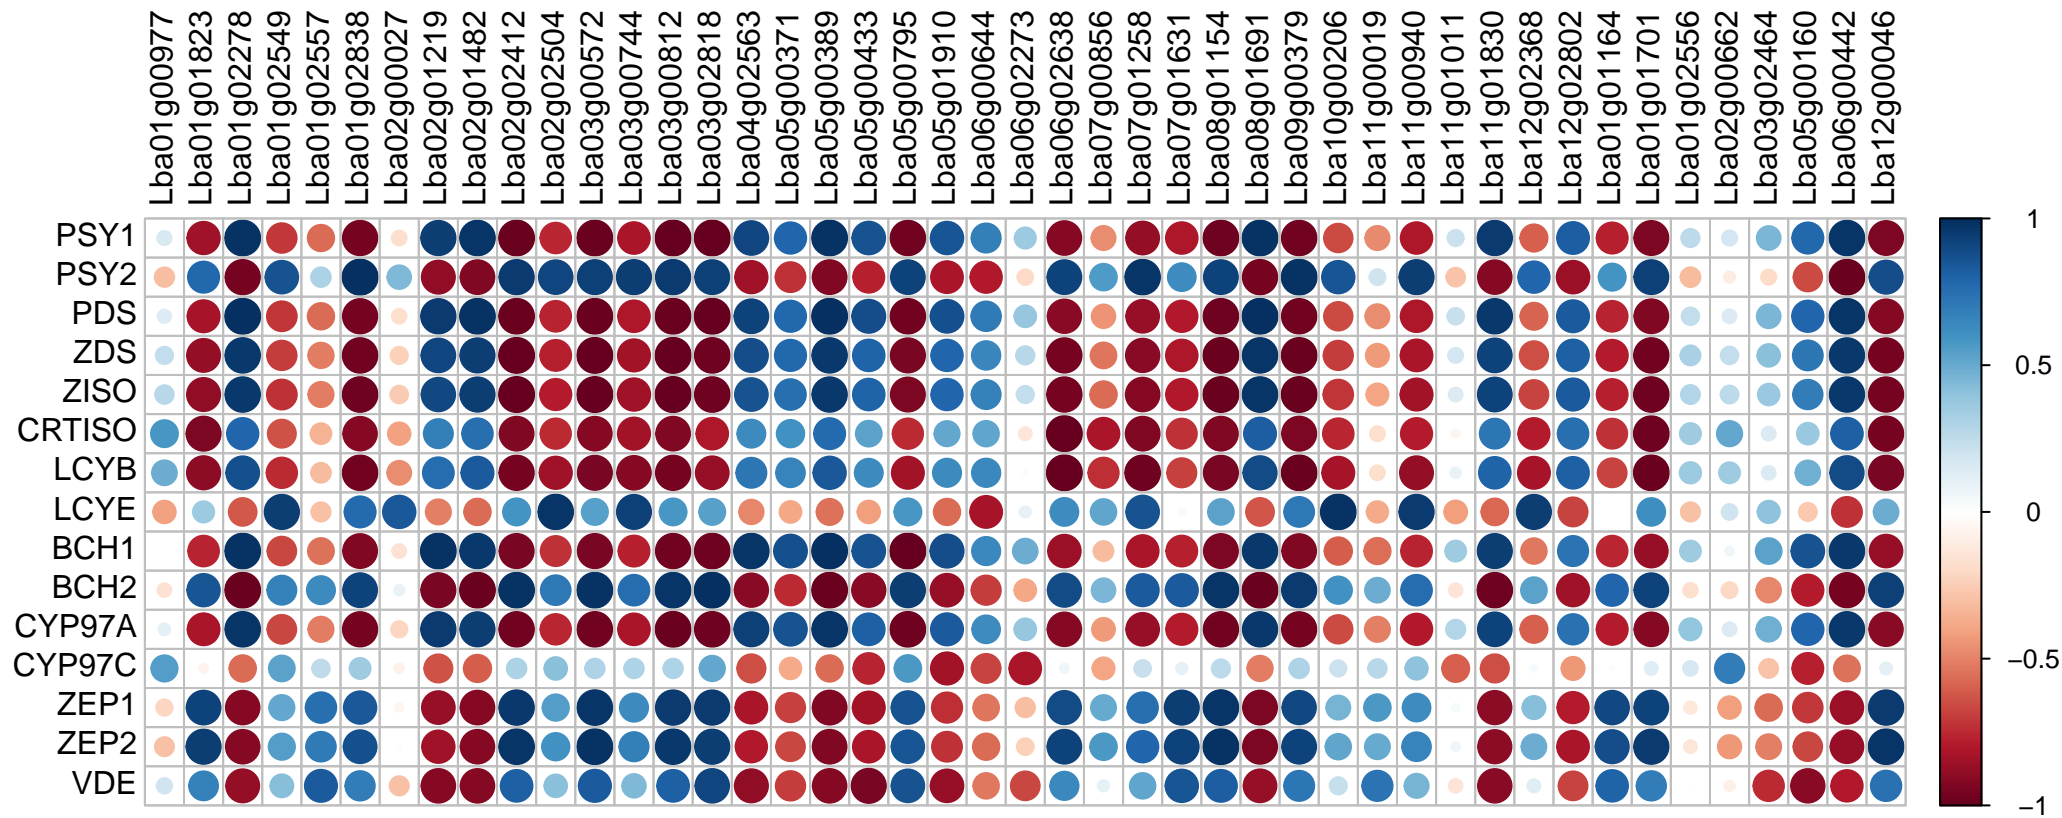

Supplement: s1 [file s1]

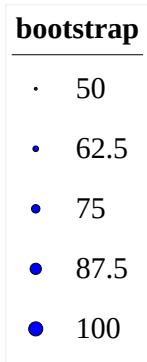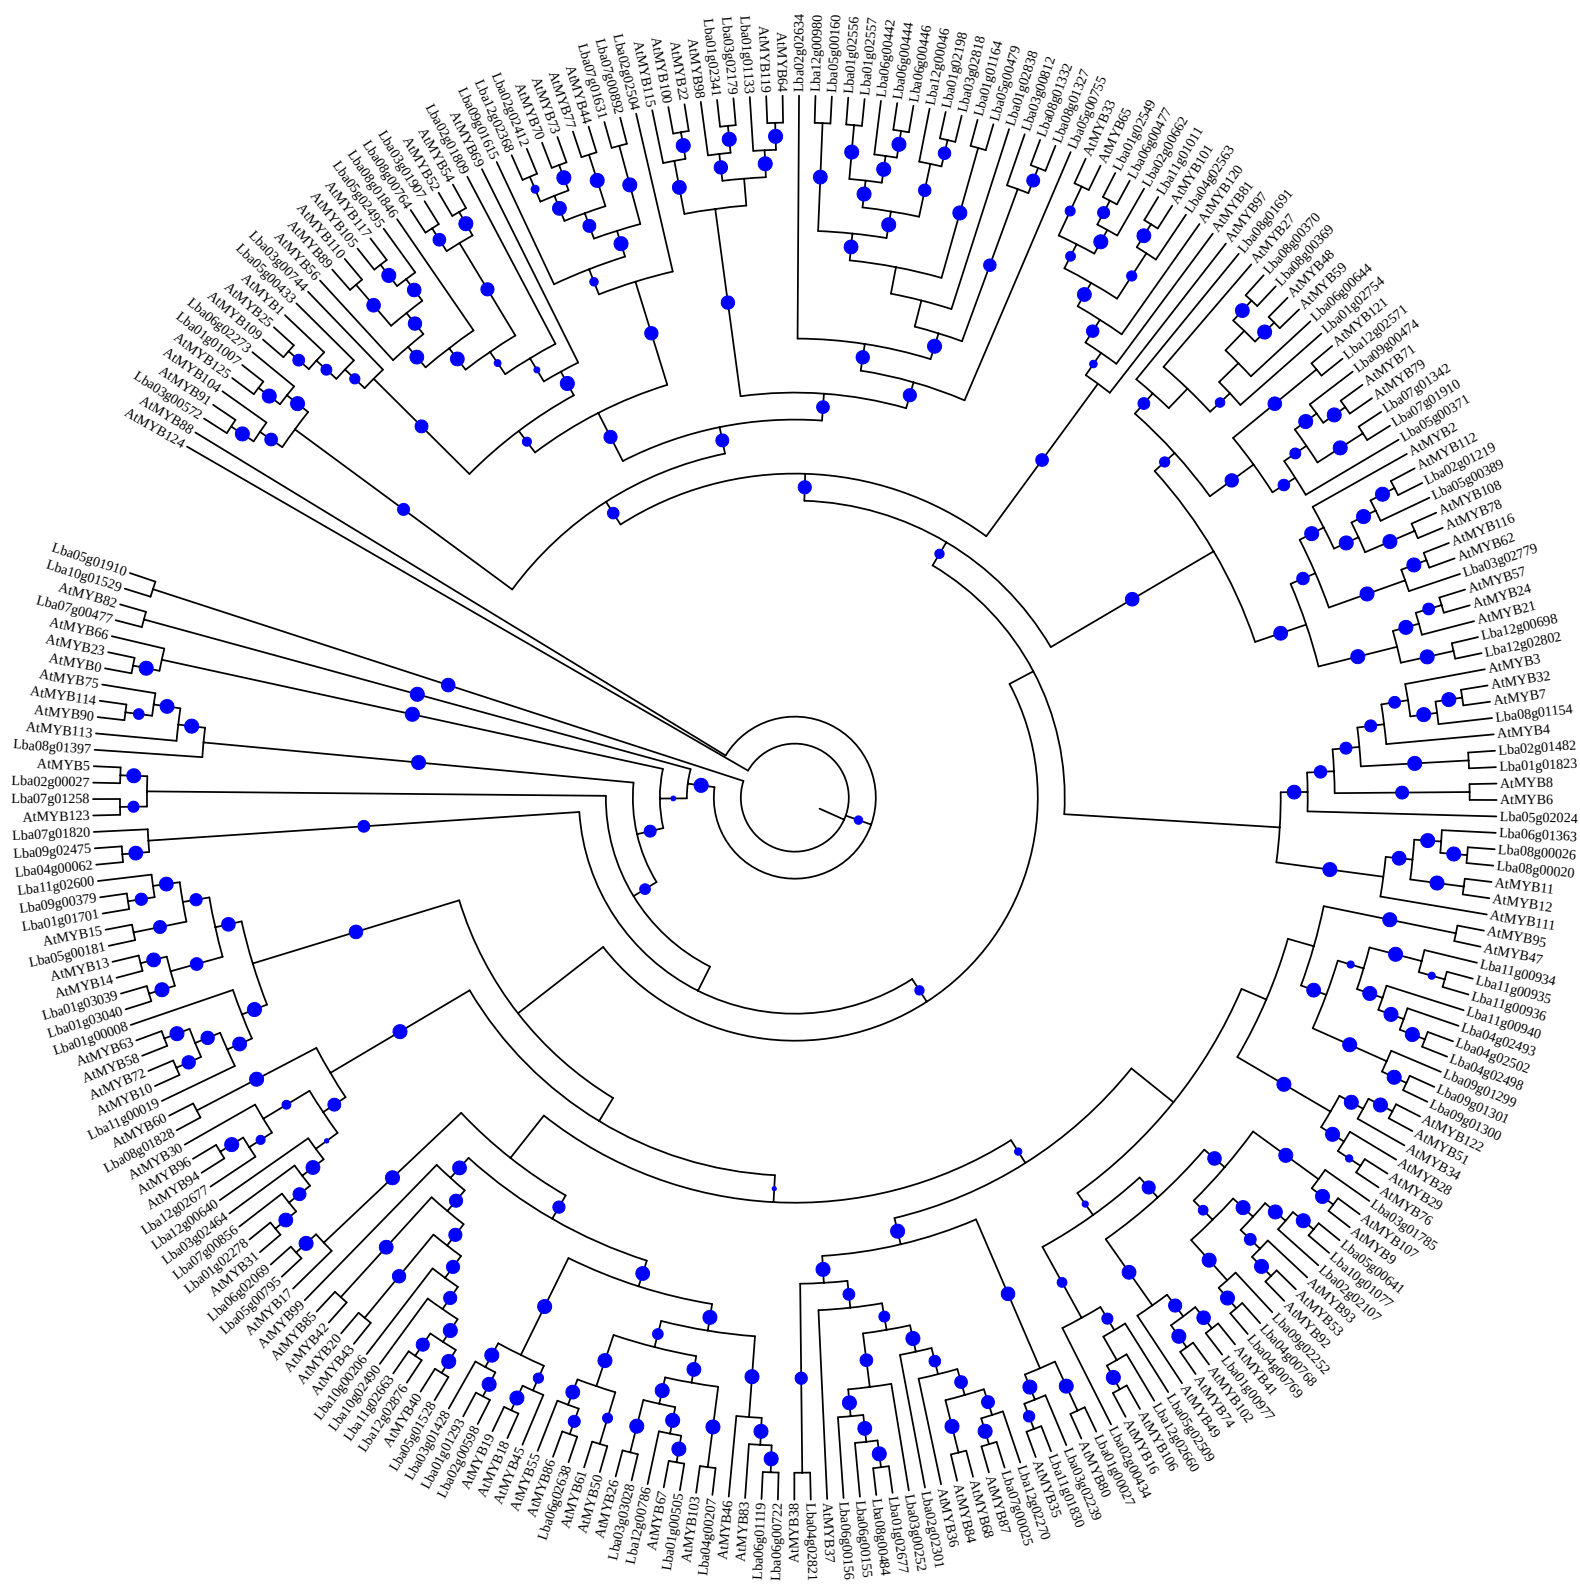

Supplement: s1 [file s1]
